# Supplementary material for: The potential of sedimentary ancient DNA for reconstructing past sea ice evolution
Source: PubMed Central journal article supplement (PMC6776040; doi:10.1038/s41396-019-0457-1), 2019-06-24

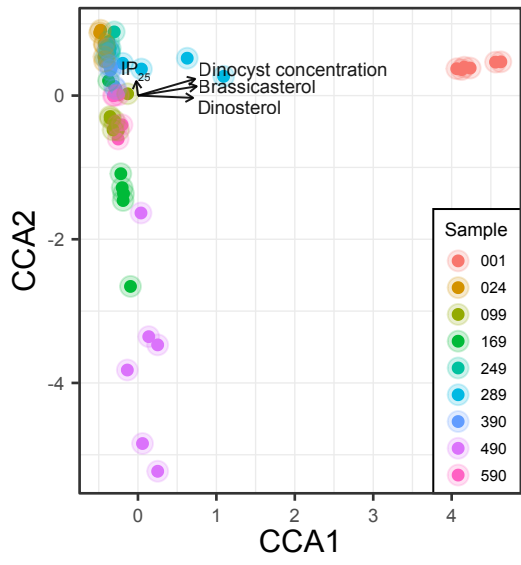

Supplement: 41396_2019_457_MOESM2_ESM.pdf [file 41396_2019_457_MOESM2_ESM.pdf]
